# Supplementary material for: Combining serological and contact data to derive target immunity levels for achieving and maintaining measles elimination
Source: Springer Nature journal article supplement (doi:10.1186/s12916-019-1413-7), 2019-09-24

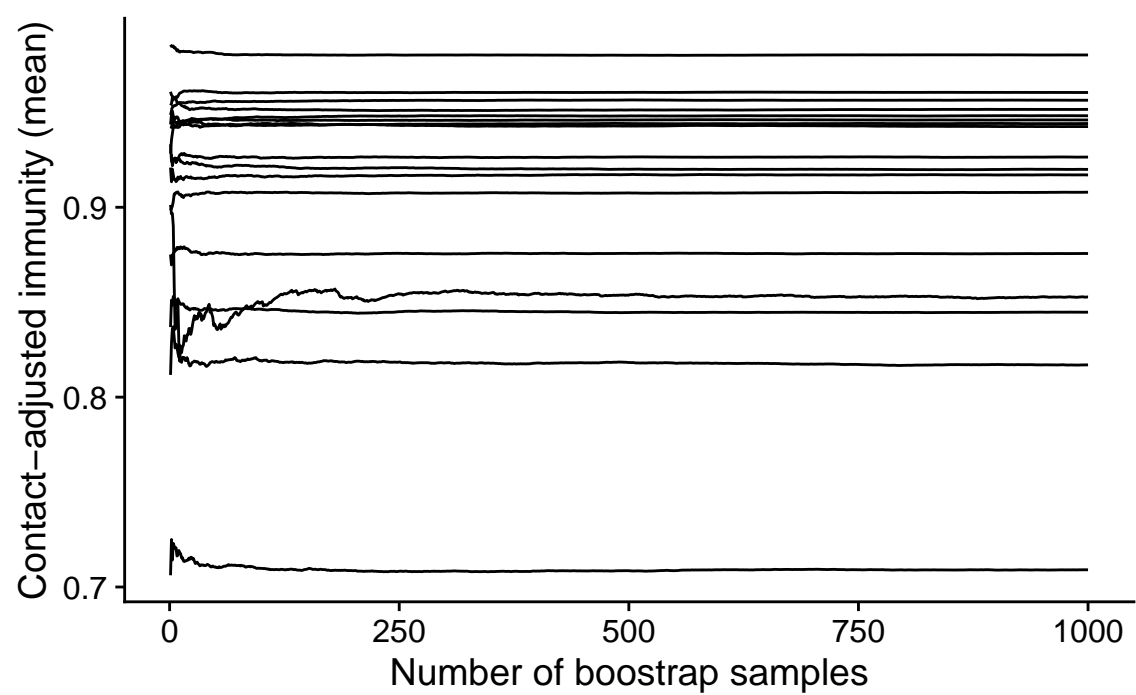

Supplement: MOESM1 [file 17208302]
